# Supplementary material
Source: bioRxiv or medRxiv preprint supplement (https://www.biorxiv.org/highwire/filestream/83669/field_highwire_adjunct_files/4/272120-5.pdf)
Supplement: Supplementary file [file 272120-5.pdf]

# Supplementary Information

Active degradation of a regulator controls coordination of downstream genes  
N. A. Rossi, T. Mora, A. M. Walczak, M. J. Dunlop

## 1 Plasmids

### 1.1 Reporters

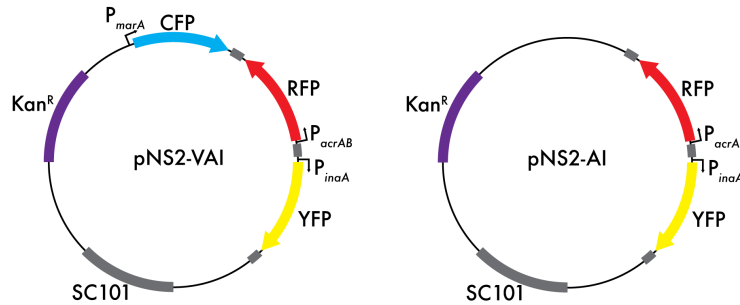

**Plasmid maps of pNS2-VAI and pNS2-AI.** These are the reporter plasmids for the MarA fusion and CRISPRi systems. pNS2-VAI includes three fluorescent protein genes (cerulean CFP, mCherry RFP, and venus YFP) under the control of the promoters as indicated, a low-copy SC101 origin of replication, and a kanamycin resistance marker. pNS2-AI is identical in terms of features with the absence of *cfp* and the corresponding promoter.

| Construct   | Primers                                                 |
|-------------|---------------------------------------------------------|
| $P_{acrAB}$ | F: GCCAGTAGATTGCACCGCG<br>R: TCGTGCTATGGTACATACATTCACA  |
| $P_{inaA}$  | F: CAATGCTTTTCAGCGTTAACTCTG<br>R: ACGACAATGACTATAGGTGGT |
| $P_{marA}$  | F: GGTTGTTATCCTGTGTATCTGG<br>R: ATTAGTTGCCCTGGCAAG      |

Table 1: Primers for construction of transcriptional reporter plasmids

### 1.2 CRISPRi knock down

To knock down endogenous Lon protease we used the plasmids and methods from [1]. To target the *lon* gene, we designed the sequence TAAACCACCACATTGCGCAG which binds  $\sim 100$

base-pairs after the transcriptional start site of the *lon* gene. This sequence has a single mutation (underlined letter) at the 14th base-pair. This decreases its repression and causes leaky expression of *lon* to avoid producing off-target phenotypic changes such as increased filamentation (Fig. S1).

### 1.3 *lon* knockout

To knock out *lon* for Fig. S1 we used the primers from [2]: TCGTGTCATCTGATTACCTGGCG-GAAATTA~~AA~~CTAAGAGAGAGCTCTATGATTCCGGGGATCCGTCGACC and TTTTATTA GTGCATTTTGC~~CG~~GAGGTCACTATTTTGCAGTCACAACCTGTGTAGGCTGGAGCTGC TTCG along with the pKD13 plasmid [3].

## 2 Analytic solutions for variance and mutual information over time

Following the methods outlined in [4] we derived the exact analytical solutions for the models described in the text. This allowed us to describe how variance evolves as a function of time for the input X and its two downstream targets Y and Z.

$$\text{Var}\{x(t)\} = \frac{1}{2}\tau_x \left(1 - e^{-\frac{2t}{\tau_x}}\right) \quad (1)$$

$$\begin{aligned} \text{Var}\{y(t)\} = & \frac{\tau_y e^{-2t\left(\frac{1}{\tau_y} + \frac{1}{\tau_x}\right)}}{2(\tau_x - \tau_y)^2(\tau_x + \tau_y)} \left( \frac{g_y^2 \tau_x^4}{\tau_y} e^{\frac{2t}{\tau_y}} \left(e^{\frac{2t}{\tau_x}} - 1\right) \right. \\ & \left. + \tau_x^3 \left( e^{\frac{2t}{\tau_x}} \left(e^{\frac{2t}{\tau_y}} - 1\right) - g_y^2 \left( e^{\frac{2t}{\tau_x}} - 4e^{t\left(\frac{1}{\tau_y} + \frac{1}{\tau_x}\right)} + 2e^{2t\left(\frac{1}{\tau_y} + \frac{1}{\tau_x}\right)} + e^{\frac{2t}{\tau_y}} \right) \right) \right) \quad (2) \\ & \left. + \tau_y \tau_x^2 (g_y^2 - 1) e^{\frac{2t}{\tau_x}} \left(e^{\frac{2t}{\tau_y}} - 1\right) - \tau_y^2 \tau_x e^{\frac{2t}{\tau_x}} \left(e^{\frac{2t}{\tau_y}} - 1\right) + \tau_y^3 e^{\frac{2t}{\tau_x}} \left(e^{\frac{2t}{\tau_y}} - 1\right) \right) \end{aligned}$$

$$\begin{aligned} \text{Var}\{z(t)\} = & \frac{\tau_z e^{-2t\left(\frac{1}{\tau_z} + \frac{1}{\tau_x}\right)}}{2(\tau_x - \tau_z)^2(\tau_x + \tau_z)} \left( \frac{g_z^2 \tau_x^4}{\tau_z} e^{\frac{2t}{\tau_z}} \left(e^{\frac{2t}{\tau_x}} - 1\right) \right. \\ & \left. + \tau_x^3 \left( e^{\frac{2t}{\tau_x}} \left(e^{\frac{2t}{\tau_z}} - 1\right) - g_z^2 \left( e^{\frac{2t}{\tau_x}} - 4e^{t\left(\frac{1}{\tau_z} + \frac{1}{\tau_x}\right)} + 2e^{2t\left(\frac{1}{\tau_z} + \frac{1}{\tau_x}\right)} + e^{\frac{2t}{\tau_z}} \right) \right) \right) \quad (3) \\ & \left. + \tau_z \tau_x^2 (g_z^2 - 1) e^{\frac{2t}{\tau_x}} \left(e^{\frac{2t}{\tau_z}} - 1\right) - \tau_z^2 \tau_x e^{\frac{2t}{\tau_x}} \left(e^{\frac{2t}{\tau_z}} - 1\right) + \tau_z^3 e^{\frac{2t}{\tau_x}} \left(e^{\frac{2t}{\tau_z}} - 1\right) \right) \end{aligned}$$

Next, in order to quantify how coordinated diversity of two downstream genes evolves over time we compute the mutual information between the two genes as a function of time. To compute this, we first calculate the covariance over time.

$$\begin{aligned}
Cov\{y(t), z(t)\} = & \frac{\tau_x^2 \tau_y \tau_z}{2(\tau_x^2 - \tau_y^2)(\tau_y + \tau_z)(\tau_x^2 - \tau_z^2)(\tau_x(\tau_y + \tau_z) - 2\tau_y \tau_z)} \left( \frac{g_y^2}{\tau_y} (\tau_x \right. \\
& \left. + \tau_z) e^{-t\left(\frac{2}{\tau_y} + \frac{1}{\tau_z} + \frac{3}{\tau_x}\right)} \left( (\tau_y + \tau_z) \tau_x^3 e^{t\left(\frac{2}{\tau_y} + \frac{1}{\tau_z} + \frac{1}{\tau_x}\right)} \left( e^{\frac{2t}{\tau_x}} - 1 \right) \right. \right. \\
& \left. \left. + \tau_x^2 e^{t\left(\frac{1}{\tau_y} + \frac{1}{\tau_x}\right)} \left( 2\tau_y^2 e^{t\left(\frac{1}{\tau_z} + \frac{1}{\tau_x}\right)} - \tau_y^2 e^{t\left(\frac{1}{\tau_z} + \frac{1}{\tau_y}\right)} + 4\tau_z \tau_y e^{t\left(\frac{1}{\tau_z} + \frac{1}{\tau_x}\right)} - 2\tau_z^2 e^{\frac{2t}{\tau_x}} + 2\tau_z^2 e^{t\left(\frac{1}{\tau_z} + \frac{1}{\tau_x}\right)} + \right. \right. \\
& \left. \left. \tau_z^2 e^{t\left(\frac{1}{\tau_z} + \frac{1}{\tau_y}\right)} - (\tau_y^2 + 4\tau_z \tau_y + \tau_z^2) e^{t\left(\frac{1}{\tau_y} + \frac{1}{\tau_z} + \frac{2}{\tau_x}\right)} \right) \right. \\
& \left. \left. + \tau_y \tau_z (\tau_y + \tau_z) \tau_x e^{t\left(\frac{1}{\tau_y} + \frac{1}{\tau_z} + \frac{1}{\tau_x}\right)} \left( -4e^{\frac{t}{\tau_x}} + 3e^{t\left(\frac{1}{\tau_y} + \frac{2}{\tau_x}\right)} + e^{\frac{t}{\tau_y}} \right) \right. \right. \\
& \left. \left. - 2\tau_y^2 \tau_z^2 e^{t\left(\frac{1}{\tau_y} + \frac{3}{\tau_x}\right)} \left( e^{t\left(\frac{1}{\tau_z} + \frac{1}{\tau_x}\right)} - 1 \right) \right) \right) + \frac{g_y^2}{\tau_y^2} (\tau_x \\
& \left. + \tau_y) \tau_z e^{-t\left(\frac{1}{\tau_y} + \frac{2}{\tau_z} + \frac{3}{\tau_x}\right)} \left( e^{t\left(\frac{1}{\tau_z} + \frac{1}{\tau_y}\right)} \left( 2\tau_x (\tau_y + \tau_z) (\tau_x (\tau_y + \tau_z) - 2\tau_y \tau_z) e^{\frac{2t}{\tau_x}} + 2(\tau_x - \tau_y) e^{t\left(\frac{1}{\tau_z} + \frac{2}{\tau_x}\right)} \right. \right. \\
& \left. \left. \left( \left( (\tau_y + \tau_z) \tau_x^2 - \tau_y \tau_z \tau_x + \tau_y \tau_z^2 \right) \sinh\left(\frac{t}{\tau_x}\right) + \tau_z (\tau_y \tau_z - \tau_x (2\tau_y + \tau_z)) \cosh\left(\frac{t}{\tau_x}\right) \right) \right) \right) \right. \\
& \left. \left. - 2\tau_y^2 (\tau_x^2 - \tau_z^2) e^{t\left(\frac{1}{\tau_z} + \frac{3}{\tau_x}\right)} \right) \right)
\end{aligned} \tag{4}$$

Next, the correlation of Y and Z is calculated by combining equations 2, 3, and 4 as :

$$Corr\{y(t), z(t)\} = \frac{Cov\{y(t), z(t)\}^2}{Var\{y(t)\}Var\{z(t)\}} \tag{5}$$

This is then converted to mutual information by the following equivalence

$$I\{y(t), z(t)\} = -\frac{1}{2} \ln(1 - Corr\{y(t), z(t)\}^2) \tag{6}$$

Note this analytical conversion assumes Gaussian statistics for the underlying stochastic differential equations.

### 3 Analytic solutions for variance and mutual information over time with scaled variance

The solutions to the equations as illustrated in Figure 3 in the main text are similar to that in Figure 2 except the variance is constrained as a function of correlation time  $\tau$ .

$$Var\{x(t)\} = 1 - e^{-\frac{2t}{\tau_x}} \tag{7}$$

$$\begin{aligned}
\text{Var}\{y(t)\} = \frac{e^{-t\left(\frac{1}{\tau_x} + \frac{1}{\tau_y}\right)}}{(\tau_x - \tau_y)^2 (\tau_x + \tau_y)} & \left( -g_y^2 \tau_x^2 (\tau_x + \tau_y) e^{t\left(\frac{1}{\tau_y} - \frac{1}{\tau_x}\right)} \right. \\
& + (\tau_x - \tau_y)^2 (g_y^2 \tau_x + \tau_x + \tau_y) e^{t\left(\frac{1}{\tau_x} + \frac{1}{\tau_y}\right)} \\
& \left. - (\tau_x + \tau_y) (\tau_x \tau_y (g_y^2 - 2) + \tau_x^2 + \tau_y^2) e^{t\left(\frac{1}{\tau_x} - \frac{1}{\tau_y}\right)} + 4g_y^2 \tau_x^2 \tau_y \right) \quad (8)
\end{aligned}$$

$$\begin{aligned}
\text{Var}\{z(t)\} = \frac{e^{-t\left(\frac{1}{\tau_x} + \frac{1}{\tau_z}\right)}}{(\tau_x - \tau_z)^2 (\tau_x + \tau_z)} & \left( -g_z^2 \tau_x^2 (\tau_x + \tau_z) e^{t\left(\frac{1}{\tau_z} - \frac{1}{\tau_x}\right)} \right. \\
& + (\tau_x - \tau_z)^2 (g_z^2 \tau_x + \tau_x + \tau_z) e^{t\left(\frac{1}{\tau_x} + \frac{1}{\tau_z}\right)} \\
& \left. - (\tau_x + \tau_z) (\tau_x \tau_z (g_z^2 - 2) + \tau_x^2 + \tau_z^2) e^{t\left(\frac{1}{\tau_x} - \frac{1}{\tau_z}\right)} + 4g_z^2 \tau_x^2 \tau_z \right) \quad (9)
\end{aligned}$$

$$\begin{aligned}
\text{Cov}\{y(t), z(t)\} = \frac{e^{-t\left(\frac{1}{\tau_y} + \frac{1}{\tau_z} + \frac{3}{\tau_x}\right)}}{(\tau_x^2 - \tau_y^2) (\tau_y + \tau_z) (\tau_x^2 - \tau_z^2) (\tau_x (\tau_y + \tau_z) - 2\tau_y \tau_z)} & \tau_x \tau_y \tau_z \left( \tau_y (\tau_x \right. \\
& \left. + \tau_z) \left( e^{t\left(\frac{1}{\tau_y} + \frac{1}{\tau_z} + \frac{1}{\tau_x}\right)} \left( -1 + e^{\frac{2t}{\tau_x}} \right) (\tau_y + \tau_z) \tau_x^3 \right. \right. \\
& + \left( 2e^{t\left(\frac{1}{\tau_z} + \frac{2}{\tau_x}\right)} \tau_y^2 - e^{t\left(\frac{1}{\tau_y} + \frac{1}{\tau_z} + \frac{1}{\tau_x}\right)} \tau_y^2 + 4e^{t\left(\frac{1}{\tau_z} + \frac{2}{\tau_x}\right)} \tau_z \tau_y - 2e^{\frac{3t}{\tau_x}} \tau_z^2 + 2e^{t\left(\frac{1}{\tau_z} + \frac{2}{\tau_x}\right)} \tau_z^2 + e^{t\left(\frac{1}{\tau_y} + \frac{1}{\tau_z} + \frac{1}{\tau_x}\right)} \tau_z^2 - \right. \\
& \left. \left. e^{t\left(\frac{1}{\tau_y} + \frac{1}{\tau_z} + \frac{3}{\tau_x}\right)} (\tau_y^2 + 4\tau_z \tau_y + \tau_z^2) \right) \tau_x^2 \right. \\
& + e^{t\left(\frac{1}{\tau_z} + \frac{1}{\tau_x}\right)} \left( -4e^{\frac{t}{\tau_x}} + 3e^{t\left(\frac{1}{\tau_y} + \frac{2}{\tau_x}\right)} + e^{\frac{t}{\tau_y}} \right) \tau_y \tau_z (\tau_y + \tau_z) \tau_x \\
& - 2e^{\frac{3t}{\tau_x}} \left( -1 + e^{t\left(\frac{1}{\tau_z} + \frac{1}{\tau_y}\right)} \right) \tau_y^2 \tau_z^2 \right) \frac{g_y^2}{\tau_y^2} \\
& + \frac{g_z^2}{\tau_z^2} (\tau_x + \tau_y) \tau_z \left( e^{t\left(\frac{1}{\tau_y} + \frac{1}{\tau_z} + \frac{1}{\tau_x}\right)} \left( -1 + e^{\frac{2t}{\tau_x}} \right) (\tau_y + \tau_z) \tau_x^3 \right. \\
& + \left( -2e^{\frac{3t}{\tau_x}} \tau_y^2 + 2e^{t\left(\frac{1}{\tau_y} + \frac{2}{\tau_x}\right)} \tau_y^2 + e^{t\left(\frac{1}{\tau_y} + \frac{1}{\tau_z} + \frac{1}{\tau_x}\right)} \tau_y^2 + 4e^{t\left(\frac{1}{\tau_y} + \frac{2}{\tau_x}\right)} \tau_z \tau_y + 2e^{t\left(\frac{1}{\tau_y} + \frac{2}{\tau_x}\right)} \tau_z^2 - e^{t\left(\frac{1}{\tau_y} + \frac{1}{\tau_z} + \frac{1}{\tau_x}\right)} \tau_z^2 - \right. \\
& \left. \left. e^{t\left(\frac{1}{\tau_y} + \frac{1}{\tau_z} + \frac{3}{\tau_x}\right)} (\tau_y^2 + 4\tau_z \tau_y + \tau_z^2) \right) \tau_x^2 + e^{t\left(\frac{1}{\tau_y} + \frac{1}{\tau_x}\right)} \left( -4e^{\frac{t}{\tau_x}} + 3e^{t\left(\frac{1}{\tau_z} + \frac{2}{\tau_x}\right)} + e^{\frac{t}{\tau_z}} \right) \tau_y \tau_z (\tau_y + \tau_z) \tau_x \right. \\
& \left. - 2e^{\frac{3t}{\tau_x}} \left( -1 + e^{t\left(\frac{1}{\tau_z} + \frac{1}{\tau_y}\right)} \right) \tau_y^2 \tau_z^2 \right) \quad (10)
\end{aligned}$$

## 4 Modified model incorporating growth rate

To consider the effects of growth rate on the system we modified Eqn. 7 to include terms modeling the exponential growth of a bacterial microcolony.

$$Var\{x(t)\} = \left(1 - e^{-\frac{2t}{\tau_x}}\right) \left(1 - \frac{1}{N_{cells} e^{\frac{\ln(2)}{t_{div}} t}}\right) \quad (11)$$

where  $N_{cells}$  is the starting number of cells,  $t_{div}$  is the division time (or length of cell cycle) in minutes.  $\tau_x$  is the correlation time of the activator, while  $t$  is measured in minutes.

## 5 Parameters

| Parameter   | Value                       | Definition                   |
|-------------|-----------------------------|------------------------------|
| $\lambda_x$ | range from 1 to 100         | half-life of x               |
| $\tau_x$    | $\frac{\lambda_x}{\log(2)}$ | correlation-time of x        |
| $\tau_y$    | $\frac{30.0}{\log(2)}$      | correlation-time of y        |
| $\tau_z$    | $\frac{30.0}{\log(2)}$      | correlation-time of z        |
| $g_y$       | $0.1\tau_y$                 | dose response gain of x on y |
| $g_z$       | $0.1\tau_z$                 | dose response gain of x on z |

Table 2: Parameters used for stochastic simulations and analytical solutions

## References

- [1] Lei S Qi, Matthew H Larson, Luke A Gilbert, Jennifer A Doudna, Jonathan S Weissman, Adam P Arkin, and Wendell A Lim. Repurposing crispr as an rna-guided platform for sequence-specific control of gene expression. *Cell*, 152(5):1173–1183, 2013.
- [2] Tomoya Baba, Takeshi Ara, Miki Hasegawa, Yuki Takai, Yoshiko Okumura, Miki Baba, Kirill A Datsenko, Masaru Tomita, Barry L Wanner, and Hirotada Mori. Construction of escherichia coli k-12 in-frame, single-gene knockout mutants: the keio collection. *Molecular systems biology*, 2(1), 2006.
- [3] Kirill A Datsenko and Barry L Wanner. One-step inactivation of chromosomal genes in escherichia coli k-12 using pcr products. *Proceedings of the National Academy of Sciences*, 97(12):6640–6645, 2000.
- [4] Daniel T Gillespie. Exact numerical simulation of the ornstein-uhlenbeck process and its integral. *Physical review E*, 54(2):2084, 1996.
